# Supplementary material for: BMP2 promotes proliferation and invasion of nasopharyngeal carcinoma cells via mTORC1 pathway
Source: publisher site journal article supplement (doi:10.18632/aging.101230), 2017-04-28
Supplement: Supplementary file 1 [file aging-v9i4-101230-supplementary-material-SD1.pdf]

## SUPPLEMENTARY MATERIAL

**Supplementary Table 1. BMP2 was up-regulated in C666-1 and CNE2 cells compared with NP69 cells in RNA-Seq data.**

| Gene | Mean expression value |         |         | log <sub>2</sub> (fold change) | P-value |
|------|-----------------------|---------|---------|--------------------------------|---------|
|      | NP69                  | C666-1  | CNE2    |                                |         |
| BMP2 | 0.7020                |         | 21.2442 | 4.9194                         | 0.0003  |
|      | 0.8166                | 14.5914 |         | 4.1593                         | 0.0077  |
